# Supplementary material
Source: publisher figshare collection journal article supplement (https://brill.figshare.com/articles/dataset/_/13348223)
Supplement: Supplementary file 1 [file 1]

## Sheet: Table S1
Table S1. Sampling details for mitochondrial DNA for Triturus karelinii.
ID	Haplotype	Locality	Latitude	Longitude
2412	TkarA01	Azerbaijan: Avyarud	38.5	48.6
2413	TkarA01
2414	TkarA02
2415	TkarA06
2416	TkarA07
4470	TkarA01	Azerbaijan: Azfilial	38.667	48.783
4471	TkarA19
4467	TkarA01	Azerbaijan: Moshkhan	38.483	48.833
4468	TkarA19
4469	TkarA02
2211	TkarA09	Georgia: Chiantba Lake	41.914	45.299
2212	TkarA09
2213	TkarA09
2214	TkarA09
2215	TkarA09
2196	TkarA09	Georgia: Chilitba lake	41.795	44.633
2221	TkarA08	Georgia: Ikalto	41.951	45.395
2222	TkarA09
2223	TkarA08
2224	TkarA09
2225	TkarA09
2173	TkarA09	Georgia: Khekordzi	41.809	44.498
2168	TkarA09	Georgia: Kobuleti	41.822	41.814
2169	TkarA09
2170	TkarA09
2171	TkarA09
2172	TkarA09
4445	TkarA18	Georgia: Machara	42.983	41.05
4446	TkarA18
4447	TkarA18
2157	TkarA09	Georgia: Pichori river valley	42.134	41.841
2158	TkarA09
2159	TkarA09
2160	TkarA09
2161	TkarA09
2162	TkarA09	Georgia: Poti	42.187	41.727
2163	TkarA09
2164	TkarA09
2165	TkarA09
2166	TkarA09
2193	TkarA09	Georgia: Satovle	41.786	44.545
2194	TkarA09
2195	TkarA09
2226	TkarA09	Georgia: Telavi	41.903	45.475
2227	TkarA08
2228	TkarA09
2229	TkarA09
2230	TkarA08
2207	TkarA09	Georgia: Tsodoreti	41.729	44.572
2208	TkarA09
2209	TkarA09
2210	TkarA09
2485	TkarA04	Iran: Alandan	36.233	53.467
2486	TkarA04
2487	TkarA04
RMNH RenA 46932-2389	TkarA03	Iran: Qu’Am Shahr	36.436	52.803
RMNH RenA 46931-2390	TkarA04
2129	TkarA12	Russia: Anapa	44.851	37.361
2130	TkarA12
2131	TkarA12
2132	TkarA12
2133	TkarA12	Russia: Anapskaya	44.883	37.438
2134	TkarA12
2135	TkarA12
2138	TkarA14	Russia: Cape Malyi Utrish	44.716	37.467
2139	TkarA14
2140	TkarA14
2141	TkarA14
2142	TkarA14
2409	TkarA12	Russia: Charnoreinje	43.917	40.65
4448	TkarA09	Russia: Ersi	41.983	47.983
4465	TkarA09
4466	TkarA09
2143	TkarA12	Russia: Goriachiy Kluch	44.563	39.032
2144	TkarA12	Russia: Kamennomostskiy	44.285	40.123
2145	TkarA12
2146	TkarA12
4477	TkarA09	Russia: Mikhgerg	41.633	47.983
4478	TkarA09
2150	TkarA12	Russia: Nalchik	43.458	43.521
2151	TkarA11
2152	TkarA12
2153	TkarA11
2154	TkarA11
2136	TkarA14	Russia: Novorossiysk	44.755	37.819
2137	TkarA12
2147	TkarA12	Russia: Psebay	44.071	40.847
2148	TkarA12
2149	TkarA12
4454	TkarA12	Russia: Yablonovskiy	44.9	38.95
4455	TkarA12
2112	TkarA16	Ukraine: Alushta	44.682	34.384
2113	TkarA16
2114	TkarA16
2115	TkarA16
2116	TkarA16
2119	TkarA16	Ukraine: Chatyr-Dag	44.688	34.234
2120	TkarA16
2121	TkarA16
2122	TkarA16
2123	TkarA16
2105	TkarA16	Ukraine: Nikita	44.538	34.243
2106	TkarA16
2107	TkarA16
2108	TkarA16
2109	TkarA16
Haplotype code	GenBank Accession number	Remarks
TkarA01	GU982391
TkarA02	GU982392
TkarA03	GU982393
TkarA04	GU982394	synonym of TkarA05
TkarA06	GU982396
TkarA07	GU982397
TkarA08	GU982398
TkarA09	GU982399	synonym of TkarA10
TkarA11	GU982401
TkarA12	GU982402	synonym of TkarA13
TkarA14	GU982404	synonym of TkarA15
TkarA16	GU982406	synonym of TkarA17
TkarA18	JQ828935
TkarA19	JX860863

## Sheet: Table S2
Table S2. Sampling details nuclear DNA and output Bayesian clustering programs for Triturus karelinii. Population numbers correspond to fig. 1 and table 1.
						Structure Δ k		Structure highest Pr(K=k)					Hierarchical Structure								BAPS spatial clustering
Number	Locality	Latitude	Longitude	ID		1	2	1	2	4	3	5	Step 1		Step 1.1		Step 1.2		Steo 1.2.1		1	2	3	4
1	Ukraine: Nikita	44.538	34.243	2105		0.9897	0.0103	0.976	0.0043	0.0073	0.0063	0.006	0.9897	0.0103			0.8545	0.1455			1	0	0	0
				2106		0.992	0.008	0.968	0.01	0.0047	0.0083	0.009	0.992	0.008			0.8719	0.1281			1	0	0	0
				2107		0.9833	0.0167	0.972	0.004	0.0077	0.011	0.0053	0.9833	0.0167			0.8657	0.1343			1	0	0	0
2	Russia: Cape Malyi Utrish	44.716	37.467	2138		0.9947	0.0053	0.0023	0.9877	0.003	0.0043	0.0027	0.9947	0.0053			0.9875	0.0125	0.5055	0.4945	0	1	0	0
				2139		0.8743	0.1257	0.0643	0.1359	0.114	0.6758	0.01	0.8743	0.1257			0.9057	0.0943	0.5044	0.4956	1	0	0	0
				2140		0.994	0.006	0.011	0.958	0.0037	0.0157	0.0117	0.994	0.006			0.9703	0.0297	0.5059	0.4941	0	1	0	0
3	Russia: Psebay	44.071	40.847	2147		0.9773	0.0227	0.015	0.817	0.0127	0.1447	0.0107	0.9773	0.0227			0.9682	0.0318	0.4999	0.5001	0	1	0	0
				2148		0.98	0.02	0.0407	0.9233	0.009	0.0217	0.0053	0.98	0.02			0.9822	0.0178	0.4966	0.5034	0	1	0	0
				2149		0.987	0.013	0.0123	0.972	0.0053	0.0063	0.004	0.987	0.013			0.9847	0.0153	0.4917	0.5083	0	1	0	0
4	Russia: Ersi	41.983	47.983	4448		0.011	0.989	0.0047	0.0043	0.983	0.0047	0.0033	0.011	0.989	0.4999	0.5001					0	0	1	0
				4465		0.006	0.994	0.004	0.004	0.982	0.007	0.003	0.006	0.994	0.5007	0.4993					0	0	1	0
				4466		0.0097	0.9903	0.003	0.0157	0.9633	0.016	0.002	0.0097	0.9903	0.5039	0.4961					0	0	1	0
5	Georgia: Kobuleti	41.822	41.814	2168		0.982	0.018	0.6118	0.0797	0.0133	0.2708	0.0244	0.982	0.018			0.8204	0.1796			1	0	0	0
				2169		0.9887	0.0113	0.5513	0.1567	0.0093	0.2107	0.072	0.9887	0.0113			0.7208	0.2792			1	0	0	0
				2170		0.966	0.034	0.542	0.1963	0.0227	0.235	0.004	0.966	0.034			0.9652	0.0348	0.509	0.491	1	0	0	0
6	Georgia: Telavi	41.903	45.475	2226		0.004	0.996	0.0033	0.002	0.9893	0.0033	0.002	0.004	0.996	0.4992	0.5008					0	0	1	0
				2227		0.004	0.996	0.0023	0.002	0.991	0.0027	0.002	0.004	0.996	0.5006	0.4994					0	0	1	0
				2228		0.0047	0.9953	0.003	0.003	0.9877	0.0033	0.003	0.0047	0.9953	0.4987	0.5013					0	0	1	0
7	Azerbaijan: Avyarud	38.5	48.6	2412		0.9677	0.0323	0.01	0.0183	0.01	0.9547	0.007	0.9677	0.0323			0.5257	0.4743			1	0	0	0
				2413		0.9713	0.0287	0.0167	0.008	0.009	0.9583	0.008	0.9713	0.0287			0.6798	0.3202			1	0	0	0
				2414		0.9807	0.0193	0.015	0.0053	0.0117	0.9314	0.0367	0.9807	0.0193			0.4049	0.5951			1	0	0	0
8	Iran: Alandan	36.233	53.467	2485		0.9927	0.0073	0.0027	0.0023	0.002	0.0037	0.9893	0.9927	0.0073			0.0102	0.9898			0	0	0	1
				2486		0.993	0.007	0.005	0.0063	0.003	0.01	0.9757	0.993	0.007			0.0257	0.9743			0	0	0	1
				2487		0.995	0.005	0.0053	0.0047	0.002	0.004	0.984	0.995	0.005			0.0165	0.9835			0	0	0	1
Explanation of colour codes Structure:
Q > 0.95
Largest Q value < 0.95

## Sheet: Table S3
Table S3. Pairwise Fst distance matrix for the eight Triturus karelinii populations for which nuclear DNA was sequenced. Population numbers correspond to fig. 1 and table 1.
	Crimean	Caucasian					Caspian
	1	2	3	4	5	6	7	8
1	-
2	0.3914	-
3	0.4375	0.1576	-
4	0.622	0.4631	0.4908	-
5	0.2783	0.1867	0.1794	0.4236	-
6	0.6438	0.4937	0.5278	-0.0556	0.4393	-
7	0.5225	0.2962	0.4334	0.5923	0.2799	0.6556	-
8	0.625	0.48	0.6064	0.7692	0.4525	0.7904	0.5823	-

## Sheet: Table S4
Table S4. Gene diversity and number of alleles per marker and population for Triturus karelinii. Population numbers correspond to fig. 1 and table 1.
Gene diversity per locus and population:
Marker	1	2	3	4	5	6	7	8	Crimean	Caucasian	Caspian
abl	0.5	0	0	0	0	0	0	0	0.5	0	0
ace	0	0	0.333	0	0	0	0.333	0	0	0.067	0.167
agl	NA	0	0	0	0	0	NA	0	NA	0.527	0
amot	0	0	0	0	0	0	0	0	0	0	0
arh	0	0	0	0	0	0	0	0	0	0	0
asxl	0	0.333	0	0	0	0	NA	0	0	0.067	0
bcor	0	0	0	0	0	0	0	0	0	0	0.6
ccdc12	0	0	0	0.333	0	0	0	0	0	0.067	0
ccdc88	0	0	0	0	0	0	0	0	0	0	0
chic	0	0	0	0	0	0	NA	0.333	0	0	0.25
clasp2	0	0	0	0	0.333	0	0	0	0	0.071	0
cnppd	0	0	0	0	0	0	0.333	0	0	0	0.667
col18	0.583	0.5	0	0	0.667	0	NA	0	0.583	0.401	0.25
cri	0	0.667	0	0	0	0.667	0	0	0	0.362	0
dbf4	0	0	0	0	0.333	0	0	0	0	0.067	0
ddx17	0	0	0	0	0	0	0	0	0	0.514	0
dnaj	0.5	0.833	0.333	0	0.333	0	0	0	0.5	0.352	0
edc4	NA	0	0	0.5	NA	0.333	NA	NA	NA	0.464	NA
eif4eb	0	0	0	0	0.667	0	0	0	0	0.203	0
fam178	0	0	0	0	0	0	0	0	0	0	0
gak	0	0.667	0	0	0	0	0	0	0	0.133	0
ganab	0	0	0	0	0	0	0	0	0	0	0
gcn1l1	0	0	0	0	0	0	0	0	0	0	0
hmp19	0	0	0	0	0.333	0	0	0	0	0.067	0
ibtk	0	0	0	0	0	0	0	0	0	0	0
kdm3	0	0	0	0	0	0	0	0	0	0	0
limch1	0	0	0	0	0	0	0	0	0	0	0
myo18a	1	1	1	1	1	0.667	1	0.667	1	0.838	0.8
ngef	0	0	0	0	0	0	0	0	0	0	0
nisc	0	0	0.5	0	0.583	0	0	0	0	0.245	0
opa	0	0	0	0	0	0	0	0	0	0	0
phf	0	0	0.333	0	0	0	0	0.333	0	0.077	0.2
phip	0	0	0	0	0	0	NA	0	0	0	0
plekhg	0	0.5	0	0.5	0	0	0.333	0	0	0.238	0.667
pros1	0	0	0	0	0	0	0	0	0	0	0
samdb	0	0	0	0	0	0	NA	0	0	0	0
scap	0	0	0	0	0	0	0	0	0	0	0
slc25	0	0	0.667	0	0.333	0	0	0	0	0.305	0
smo	0.5	0.333	0	0	0	0	0	0	0.5	0.067	0
sre	0	0.667	0.667	0	0	0	0	0	0	0.419	0
ssh2	0	0	0	0	0.5	0	0	0	0	0.129	0
supt6h	0	0	0	0	0	0	0	0	0	0	0
syncri	0	0.5	0	0	0	0	0	0	0	0.129	0
taf8	0	0	0	0	0	0	0	0	0	0	0
trab	0.333	0	0	0	0	0	0	0	0.333	0	0
tram	0	0.5	0.5	0	0	0	0	0	0	0.371	0
upf1	0	0	0	0	0	0	0	0	0	0	0
usp	0	0	0	0	0	0	0	0.5	0	0	0.35
wdr26	0	0	0	0	0	0	0	0	0	0	0
wiz	0	0	0	0	0	0	0	0	0	0	0
Average	0.06832	0.125	0.0833269	0.0448654	0.0996471	0.0320577	0.0425319	0.0359412	0.06832	0.118846	0.0774706
Corrected for missing data.
Number of alleles per marker and population:
Marker	1	2	3	4	5	6	7	8	Crimean	Caucasian	Caspian
abl_1	2	1	1	1	1	1	1	1	2	1	1
ace_1	1	1	2	1	1	1	2	1	1	2	2
agl_1	1	1	1	1	1	1	1	1	1	2	1
amot_1	1	1	1	1	1	1	1	1	1	1	1
arh_1	1	1	1	1	1	1	1	1	1	1	1
asxl_1	1	2	1	1	1	1	NA	1	1	2	1
bcor_1	1	1	1	1	1	1	1	1	1	1	2
ccdc12	1	1	1	2	1	1	1	1	1	2	1
ccdc88	1	1	1	1	1	1	1	1	1	1	1
chic_1	1	1	1	1	1	1	1	2	1	1	2
clasp2	1	1	1	1	2	1	1	1	1	2	1
cnppd	1	1	1	1	1	1	2	1	1	1	3
col18	3	2	1	1	2	1	2	1	3	2	2
cri_1	1	2	1	1	1	2	1	1	1	3	1
dbf4_1	1	1	1	1	2	1	1	1	1	2	1
ddx17	1	1	1	1	1	1	1	1	1	2	1
dnaj_1	2	3	2	1	2	1	1	1	2	3	1
edc4_1	NA	1	1	2	1	2	NA	1	NA	2	1
eif4eb	1	1	1	1	2	1	1	1	1	2	1
fam178	1	1	1	1	1	1	1	1	1	1	1
gak_1	1	2	1	1	1	1	1	1	1	2	1
ganab	1	1	1	1	1	1	1	1	1	1	1
gcn1l1	1	1	1	1	1	1	1	1	1	1	1
hmp19	1	1	1	1	2	1	1	1	1	2	1
ibtk_1	1	1	1	1	1	1	1	1	1	1	1
kdm3_1	1	1	1	1	1	1	1	1	1	1	1
limch1	1	1	1	1	1	1	1	1	1	1	1
myo18a	3	3	3	3	4	2	3	2	3	5	4
ngef_1	1	1	1	1	1	1	1	1	1	1	1
nisc_1	1	1	2	1	3	1	1	1	1	3	1
opa_1	1	1	1	1	1	1	1	1	1	1	1
phf_1	1	1	2	1	1	1	1	2	1	2	2
phip_1	1	1	1	1	1	1	1	1	1	1	1
plekhg	1	2	1	2	1	1	2	1	1	2	3
pros1	1	1	1	1	1	1	1	1	1	1	1
samdb	1	1	1	1	1	1	1	1	1	1	1
scap_1	1	1	1	1	1	1	1	1	1	1	1
slc25	1	1	2	1	2	1	1	1	1	3	1
smo_1	2	2	1	1	1	1	1	1	2	2	1
sre_1	1	2	2	1	1	1	1	1	1	2	1
ssh2_1	1	1	1	1	2	1	1	1	1	2	1
supt6h	1	1	1	1	1	1	1	1	1	1	1
syncri	1	2	1	1	1	1	1	1	1	2	1
taf8_1	1	1	1	1	1	1	1	1	1	1	1
trab_1	2	1	1	1	1	1	1	1	2	1	1
tram_1	1	2	2	1	1	1	1	1	1	2	1
upf1_1	1	1	1	1	1	1	1	1	1	1	1
usp_1	1	1	1	1	1	1	1	2	1	1	2
wdr26	1	1	1	1	1	1	1	1	1	1	1
wiz_1	1	1	1	1	1	1	1	1	1	1	1
Average	1.11765	1.21154	1.13462	1.05769	1.21154	1.01923	1.08	1.03846	1.11765	1.55769	1.21154
Corrected for missing data.
