# Supplementary material
Source: publisher figshare collection journal article supplement (https://brill.figshare.com/articles/dataset/_/13348223)
Supplement: Supplementary file 1 [file 1]

# Genetic homogeneity in a Pontocaspian crested newt species (*Triturus karelinii*) suggests recent isolation of its three allopatric range sections

Ben Wielstra<sup>1,2,\*</sup>, Jan W. Arntzen<sup>2</sup>

1 - Institute of Biology Leiden, Leiden University, 2300 RA Leiden, The Netherlands

2 - Naturalis Biodiversity Center, 2300 RA Leiden, The Netherlands

\*Corresponding author; e-mail: b.m.wielstra@biology.leidenuniv.nl

## Supplementary material

**Table S1.** Sampling details for mitochondrial DNA for *Triturus karelinii*.

**Table S2.** Sampling details nuclear DNA and output Bayesian clustering programs for *Triturus karelinii*.

**Table S3.** Pairwise Fst distance matrix for the eight *Triturus karelinii* populations for which nuclear DNA was sequenced. Population numbers correspond to fig. 1 and table 1.

**Table S4.** Gene diversity and number of alleles per marker and population for *Triturus karelinii*.

## Data Availability Statement

Sequence data and files associated with analyses are available from the Dryad Digital Repository: XXXX.
